# Supplementary material for: Improving the performance of phosphorescent polymer light-emitting diodes using morphology-stable carbazole-based iridium complexes
Source: Royal Society of Chemistry journal article supplement (doi:10.1039/b705342h), 2007-01-01
Supplement: b705342h.pdf [file b705342h.pdf]

## Electronic supplementary information (ESI)

# Improving the Performance of Phosphorescent Polymer Light-Emitting Diodes Using Morphology-Stable Carbazole-based Iridium Complexes

Kai Zhang<sup>a</sup>, Zhao Chen<sup>b</sup>, Chuluo Yang<sup>\*a</sup>, Xiaowei Zhang<sup>a</sup>, Youtian Tao<sup>a</sup>, Lian Duan<sup>a</sup>,  
Liang Chen<sup>a</sup>, Linna Zhu<sup>a</sup>, Jingui Qin<sup>\*a</sup>, Yong Cao<sup>\*b</sup>

<sup>a</sup> Department of Chemistry, Hubei Key Lab on Organic and Polymeric Optoelectronic Materials, Wuhan University, Wuhan 430072, People's Republic of China

Email: clyang@whu.edu.cn

<sup>b</sup> Institute of Polymer Optoelectronic Materials and Devices, South China University of Technology, Guangzhou 510640, People's Republic of China

E-mail: poycao@scut.edu.cn

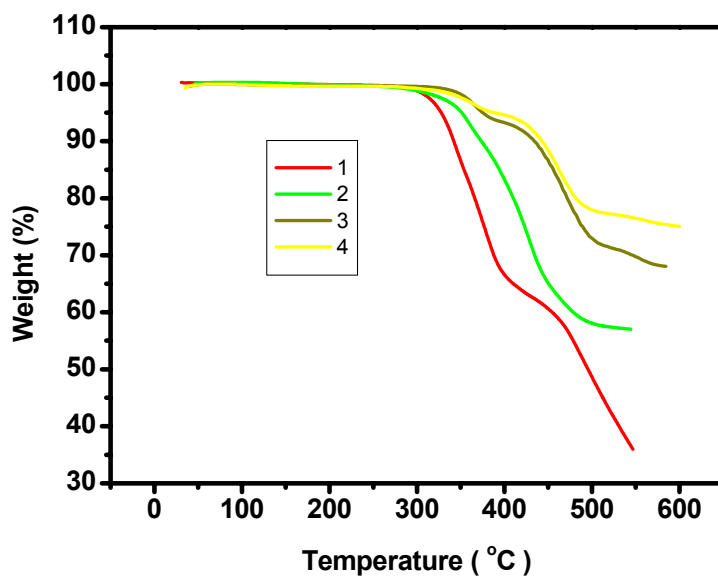

Figure S1. TGA scan for complexes 1-4.

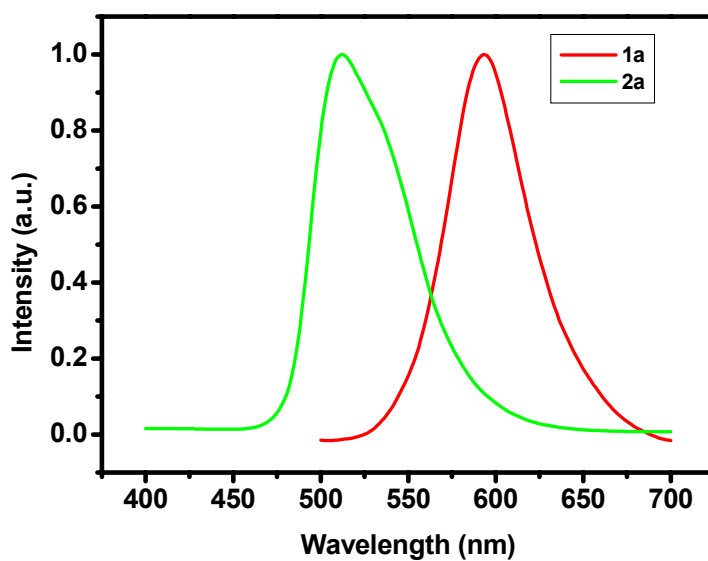

Figure S2. PL spectra of 1a and 2a recorded in CH<sub>2</sub>Cl<sub>2</sub> solution.

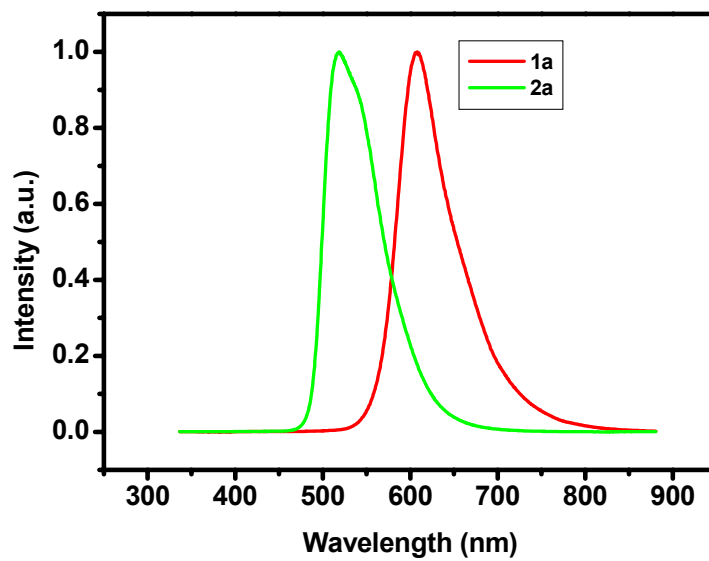

**Figure S3.** EL spectra of PLEDs using the iridium complexes **1a**, **2a** as dopants.

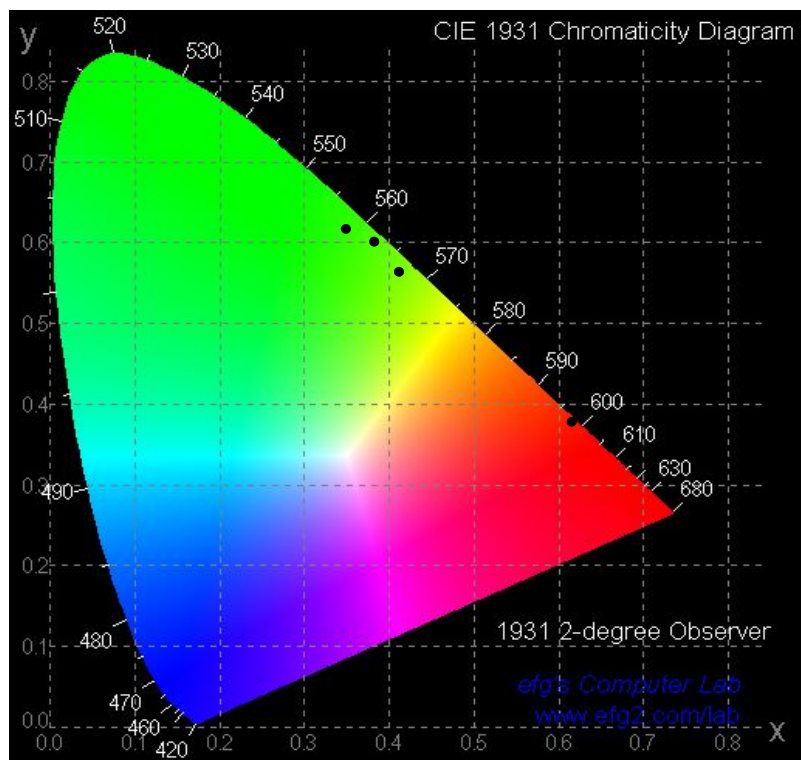

**Fig S4.** Commission Internationale de l'Eclairage coordinate plot for PLEDs using complex **1**, **2**, **3** and **4** as dopant
